# Supplementary material for: Aspergillus Is Inhibited by Pseudomonas aeruginosa Volatiles
Source: J Fungi (Basel). 2020 Jul 25;6(3):118. doi: 10.3390/jof6030118 (PMC7557479; doi:10.3390/jof6030118)
Supplement: Supplementary file 1 [file jof-06-00118-s001.zip]

Archive with 4 entries (4 files):
- Supplementary figure.pdf
- __MACOSX/._Supplementary figure.pdf
- Supplementary Table PA14 mutants.docx
- __MACOSX/._Supplementary Table PA14 mutants.docx
